# Supplementary material
Source: PubMed Central journal article supplement (PMC7158585)
Supplement: mmc1.pdf [file mmc1.pdf]

# THE LANCET

## Supplementary appendix

This appendix formed part of the original submission and has been peer reviewed. We post it as supplied by the authors.

Supplement to: Ghinai I, McPherson TD, Hunter JC, et al. First known person-to-person transmission of severe acute respiratory syndrome coronavirus 2 (SARS-CoV-2) in the USA. *Lancet* 2020; published online March 12. [http://dx.doi.org/10.1016/S0140-6736\(20\)30607-3](http://dx.doi.org/10.1016/S0140-6736(20)30607-3).

## Supplementary Material

### Illinois COVID-19 Investigation Team

| First Name | Last Name/Degree    | Affiliation                                     |
|------------|---------------------|-------------------------------------------------|
| Sarah      | Brister MPH         | Illinois Department of Public Health            |
| Kristin    | Goldesberry MPH     | Illinois Department of Public Health            |
| Stacey     | Hoferka MPH         | Illinois Department of Public Health            |
| Dejan      | Jovanov BS          | Illinois Department of Public Health            |
| Dawn       | Nims MPH            | Illinois Department of Public Health            |
| Lori       | Saathoff-Huber MPH  | Illinois Department of Public Health            |
| Chantel    | Hoskin Snelling MPH | Illinois Department of Public Health            |
| Hira       | Adil MBBS           | Chicago Department of Public Health             |
| Raabiah    | Ali MPH             | Chicago Department of Public Health             |
| Elaina     | Andreychak MPH      | Chicago Department of Public Health             |
| Kelley     | Bemis MPH           | Cook County Department of Public Health         |
| Mabel      | Frias MPH           | Cook County Department of Public Health         |
| Pearl      | Quartey-Kumapley MD | Cook County Health                              |
| Kristin    | Baskerville MPH     | DuPage County Health Department                 |
| Elizabeth  | Murphy MPH          | DuPage County Health Department                 |
| Emily      | Murskyj MPH         | DuPage County Health Department                 |
| Zach       | Noffsinger MPH      | DuPage County Health Department                 |
| Janice     | Vercillo BSN        | DuPage County Health Department                 |
| Apryll     | Elliott Med         | Kane County Health Department                   |
| Uche S.    | Onwuta MS MPH       | Kane County Health Department                   |
| Danielle   | Burck BSN           | McHenry County Health Department                |
| Glen       | Abedi MPH           | U.S. Centers for Disease Control and Prevention |
| Rachel M.  | Burke PhD           | U.S. Centers for Disease Control and Prevention |

|                  |                    |                                                 |
|------------------|--------------------|-------------------------------------------------|
| Ryan             | Fagan MD           | U.S. Centers for Disease Control and Prevention |
| Jennifer         | Farrar MPH         | U.S. Centers for Disease Control and Prevention |
| Alicia M.        | Fry MD             | U.S. Centers for Disease Control and Prevention |
| Aron J.          | Hall DVM           | U.S. Centers for Disease Control and Prevention |
| Amber            | Haynes MPH         | U.S. Centers for Disease Control and Prevention |
| Connor           | Hoff MPH           | U.S. Centers for Disease Control and Prevention |
| Shifaq           | Kamili BS          | U.S. Centers for Disease Control and Prevention |
| Marie E.         | Killerby VetMB     | U.S. Centers for Disease Control and Prevention |
| Lindsay          | Kim MD             | U.S. Centers for Disease Control and Prevention |
| Stephanie A.     | Kujawski PhD       | U.S. Centers for Disease Control and Prevention |
| David T.         | Kuhar MD           | U.S. Centers for Disease Control and Prevention |
| Brian            | Lynch BS           | U.S. Centers for Disease Control and Prevention |
| Lakshmi          | Malapati PGDCA     | U.S. Centers for Disease Control and Prevention |
| Mariel           | Marlow PhD         | U.S. Centers for Disease Control and Prevention |
| Janná R.         | Murray MPH         | U.S. Centers for Disease Control and Prevention |
| Brian            | Rha MD             | U.S. Centers for Disease Control and Prevention |
| Senthil Kumar K. | Sakthivel PhD      | U.S. Centers for Disease Control and Prevention |
| Sarah E.         | Smith-Jeffcoat MPH | U.S. Centers for Disease Control and Prevention |
| Elizabeth        | Soda MD            | U.S. Centers for Disease Control and Prevention |
| Lijuan           | Wang PhD           | U.S. Centers for Disease Control and Prevention |
| Brett L.         | Whitaker MS        | U.S. Centers for Disease Control and Prevention |
| Timothy M.       | Uyeki MD           | U.S. Centers for Disease Control and Prevention |

**Supplemental Table 1: Severe Acute Respiratory Syndrome Coronavirus 2 (SARS-CoV-2) Real-Time Reverse Transcription-Polymerase Chain Reaction Testing Results for Illinois Patient 1, by Day of Investigation and Specimen Type.\***

| Day of Investigation | 7                       | 9                       | 11                      | 13                      | 14                      | 17                      | 20           | 23       | 28                      | 30       | 31       |
|----------------------|-------------------------|-------------------------|-------------------------|-------------------------|-------------------------|-------------------------|--------------|----------|-------------------------|----------|----------|
| Nasopharyngeal swab  | Positive<br>(Ct, 37–39) | Negative                | Negative                | Negative                | Negative                | Negative                | Negative     | Negative | -                       | -        | --       |
| Oropharyngeal swab   | Positive<br>(Ct, 35–38) | Negative                | Positive<br>(Ct, 27–28) | Negative                | Negative                | Negative                | Negative     | Negative | -                       | -        | -        |
| Sputum               | Positive<br>(Ct, 24–25) | Positive<br>(Ct, 23–25) | Positive<br>(Ct, 30–31) | Positive<br>(Ct, 27–29) | Positive<br>(Ct, 29–31) | Positive<br>(Ct, 32–33) | Negative     | Negative | Positive<br>(Ct, 35–38) | Negative | Negative |
| Serum                | Negative                | Negative                | Negative                | Negative                | Negative                | Negative                | Negative     | Negative | -                       | -        | -        |
| Urine                | Negative                | Negative                | Negative                | Negative                | Negative                | -                       | Negative     | Negative | -                       | -        | -        |
| Stool                | -                       | Positive<br>(Ct, 31–34) | Positive<br>(Ct, 33–36) | Positive<br>(Ct, 35–38) | Positive<br>(Ct, 36–42) | Negative                | Inconclusive | Negative | Negative                | -        | -        |

\* Lower cycle threshold (Ct) values indicate higher viral loads.

**Supplemental Table 2: Severe Acute Respiratory Syndrome Coronavirus 2 (SARS-CoV-2) Real-Time Reverse Transcription-Polymerase Chain Reaction Testing Results for Illinois Patient 2, by Day of Investigation and Specimen Type.\***

| Day of Investigation | 11                      | 13                      | 14                  | 16                      | 18                      | 20           | 22           | 28       | 30       | 31       |
|----------------------|-------------------------|-------------------------|---------------------|-------------------------|-------------------------|--------------|--------------|----------|----------|----------|
| Nasopharyngeal swab  | Positive<br>(Ct, 37–38) | Positive<br>(Ct, 36-39) | Inconclusive        | Negative                | Negative                | Negative     | Negative     | -        | -        | -        |
| Oropharyngeal swab   | Positive<br>(Ct, 33–34) | Positive<br>(Ct, 38-40) | Negative            | Negative                | Negative                | Negative     | Negative     | -        | -        | -        |
| Sputum               | -                       | -                       | Positive<br>(31–33) | Positive<br>(Ct, 30–31) | Positive<br>(Ct, 34–36) | Inconclusive | Inconclusive | Negative | Negative | Negative |
| Serum                | Negative                | -                       | Negative            | Negative                | Negative                | Negative     | Negative     | -        | -        | -        |
| Urine                | -                       | -                       | Negative            | Negative                | Negative                | Negative     | Negative     | -        | -        | -        |
| Stool                | -                       | -                       | -                   | Negative                | Negative                | -            | Negative     | Negative | -        | -        |

\* Lower cycle threshold (Ct) values indicate higher viral loads
